# Supplementary material
Source: MDPI journal article supplement (https://www.mdpi.com/2071-1050/16/8/3210)

## Supplementary Materials

### I. Perceived ESs in Malampaya Sound.

Table S1. Overview of perceived ES in Malampaya Sound.

| Ecosystem Services |             |                                                    |
|--------------------|-------------|----------------------------------------------------|
| Provisioning       | Agriculture | Rice                                               |
|                    |             | Leafy vegetables                                   |
|                    |             | Root crops                                         |
|                    |             | Fruit-bearing trees (Coconut, cashew, mango, etc.) |
| Forestry           |             | Fire wood                                          |
|                    |             | Charcoal                                           |
|                    |             | Bamboo, Buho                                       |
|                    |             | Rattan                                             |
| Fishery            |             | Buri                                               |
|                    |             | Honey                                              |
|                    |             | Fish                                               |
|                    |             | Shellfish (Capiz, Kabitsin)                        |
| Livestock          |             | Gastropods                                         |
|                    |             | Blue crabs, Mud crabs                              |
|                    |             | Sea weed                                           |
|                    |             | Sea cucumber                                       |
| Wildlife/Bushmeat  |             | Carabao                                            |
|                    |             | Goats                                              |
|                    |             | Hogs                                               |
|                    |             | Cattle                                             |
| Medicinal plants   |             | Egg-laying hens                                    |
|                    |             | Red jungle fowl                                    |
|                    |             | Stingray                                           |
|                    |             | Peacock                                            |
| Water              |             | Pangolin                                           |
|                    |             | Porcupine                                          |
|                    |             | Sambong                                            |
|                    |             | Lagundi                                            |
|                    |             | Aramesa                                            |
|                    |             | Herba buena                                        |
|                    |             | Tawa tawa                                          |
|                    |             | Oregano                                            |
|                    |             | Spring water for drinking                          |
|                    |             |                                                    |
|                    |             |                                                    |
|                    |             |                                                    |

### II. ANOVA and linear regression analysis

# A. Value points and socio-demographic attributes (statistically-significant results)

Figure S1. Correlation between count of landscape value points (aesthetic value) and age.

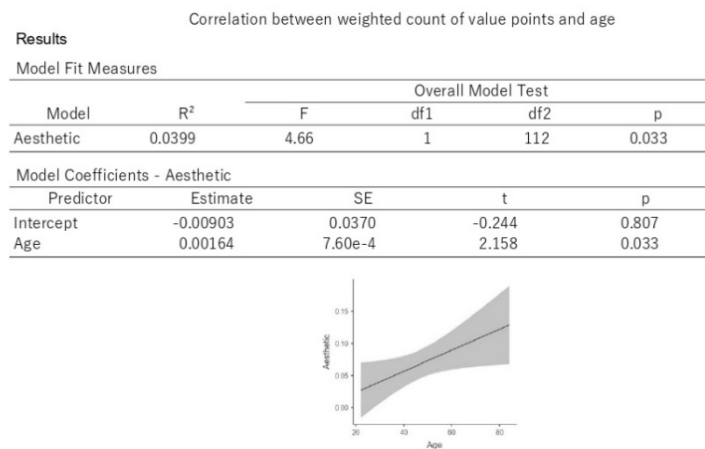

Figure S2. ANOVA of count of landscape value points (economic value) and gender.

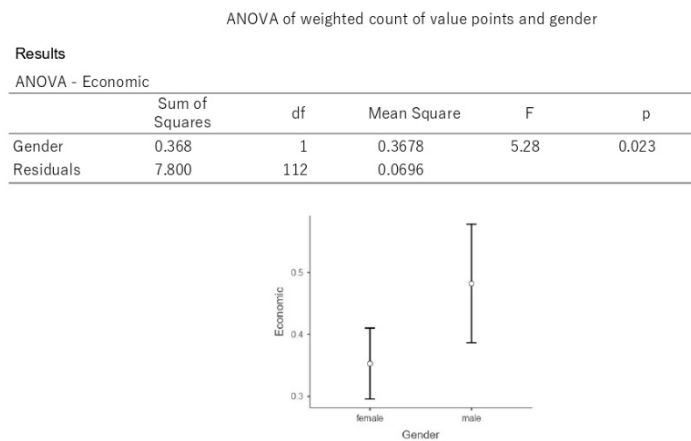

Figure S3. ANOVA of count of landscape value points (cultural value) and gender.

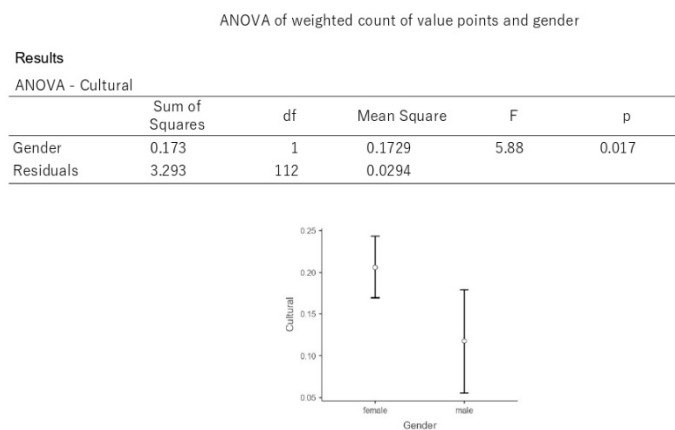

Figure S4. ANOVA of count of provisioning ESs and gender.

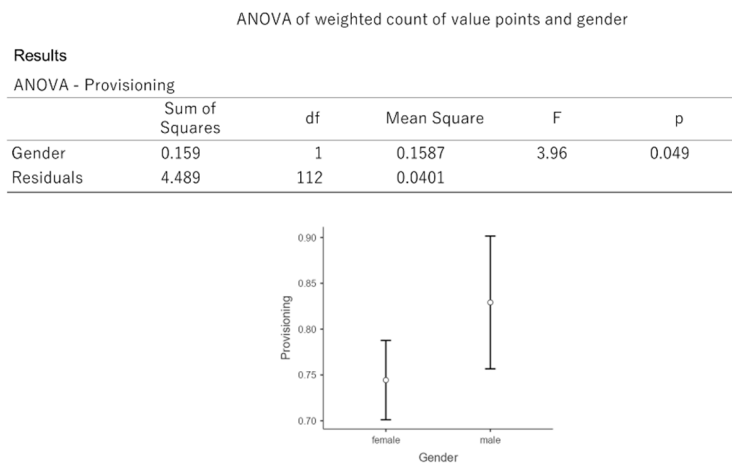

Figure S5. Correlation between count of supporting ESs and age.

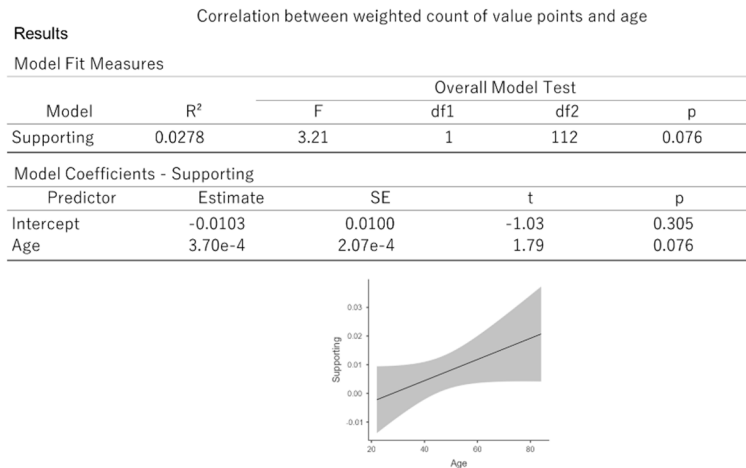

## B. Rank, trend and WTP of value points and socio-economic attributes (statistically-significant results)

Figure S6. ANOVA of trend of landscape value points (aesthetic value) and gender.

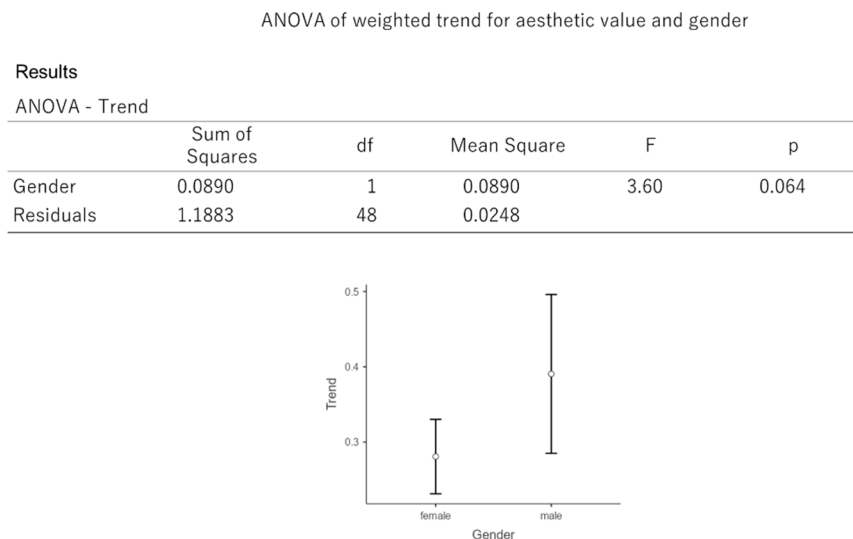

Figure S7. ANOVA of rank of landscape value points (recreation value) and nativeness.

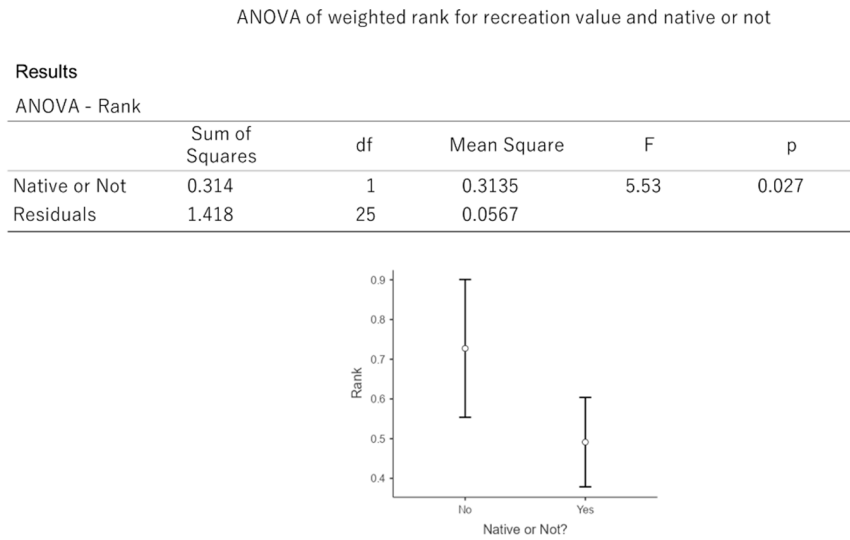

Figure S8. ANOVA of trend of landscape value points (recreation value) and nativeness.

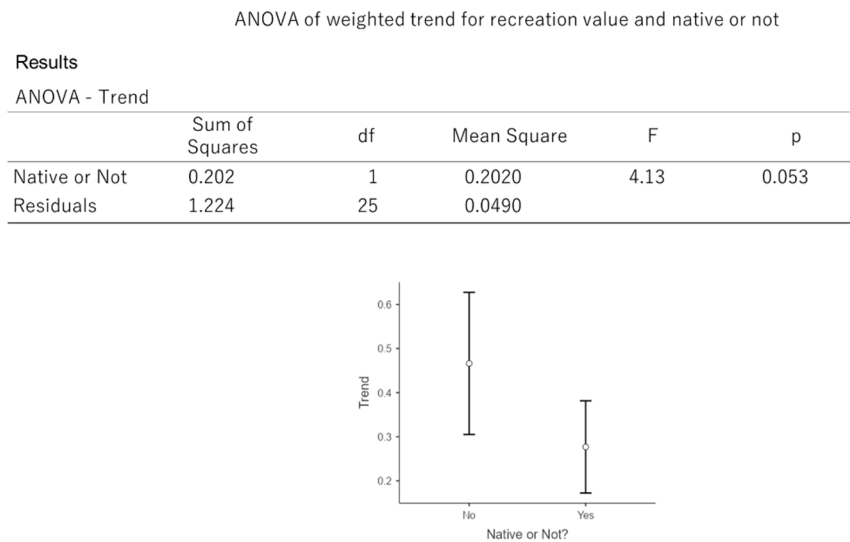

Figure S9. ANOVA of rank of landscape value points (subsistence value) and gender.

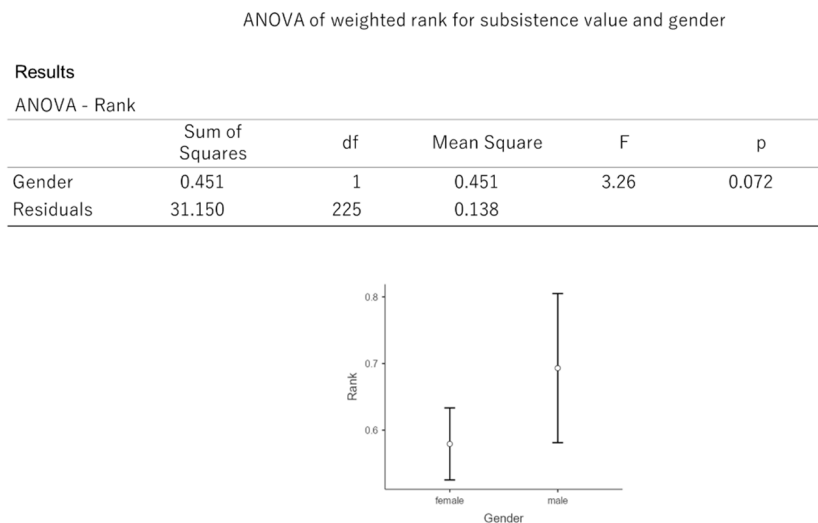

Figure S10. Correlation of trend of landscape value points (therapeutic value) and age.

Results

Correlation between weighted trend of therapeutic value and age

Model Fit Measures

| Model | R     | R <sup>2</sup> | Overall Model Test |     |     |       |
|-------|-------|----------------|--------------------|-----|-----|-------|
|       |       |                | F                  | df1 | df2 | p     |
| 1     | 0.378 | 0.143          | 6.15               | 1   | 37  | 0.018 |

Model Coefficients - Trend

| Predictor | Estimate | SE      | t     | p      |
|-----------|----------|---------|-------|--------|
| Intercept | 0.56220  | 0.08810 | 6.38  | < .001 |
| Age       | -0.00408 | 0.00164 | -2.48 | 0.018  |

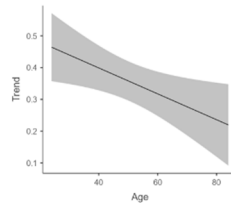

Figure S11. ANOVA of rank of cultural ESs and nativeness.

ANOVA of weighted rank for cultural services and Native or not

Results

ANOVA - Rank

|               | Sum of Squares | df  | Mean Square | F    | p     |
|---------------|----------------|-----|-------------|------|-------|
| Native or Not | 0.413          | 1   | 0.413       | 3.45 | 0.066 |
| Residuals     | 15.948         | 133 | 0.120       |      |       |

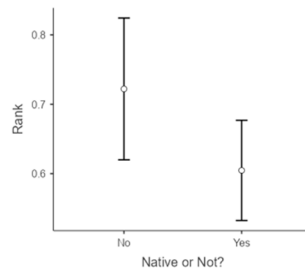

Figure S12. ANOVA of cultural ESs WTP and nativeness.

ANOVA of weighted WTP for cultural services and Native or not

Results

ANOVA - WTP

|               | Sum of Squares | df  | Mean Square | F    | p     |
|---------------|----------------|-----|-------------|------|-------|
| Native or Not | 1700           | 1   | 1700        | 3.29 | 0.072 |
| Residuals     | 68754          | 133 | 517         |      |       |

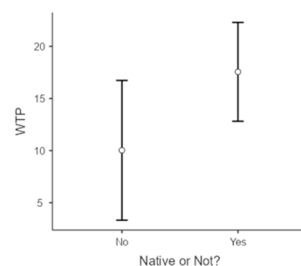

Figure S13. ANOVA of rank of provisioning ESs and gender.

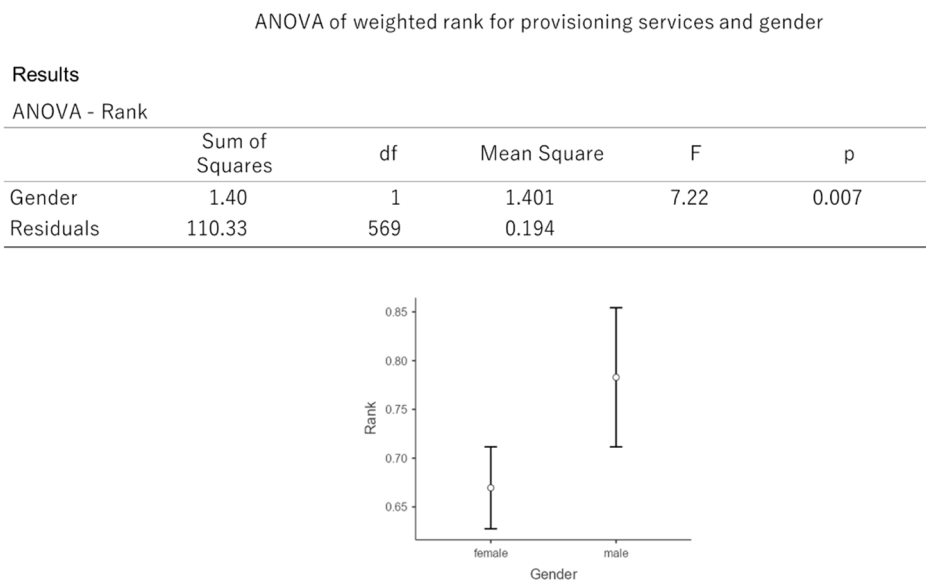

Figure S14. ANOVA of provisioning ESs WTP and gender.

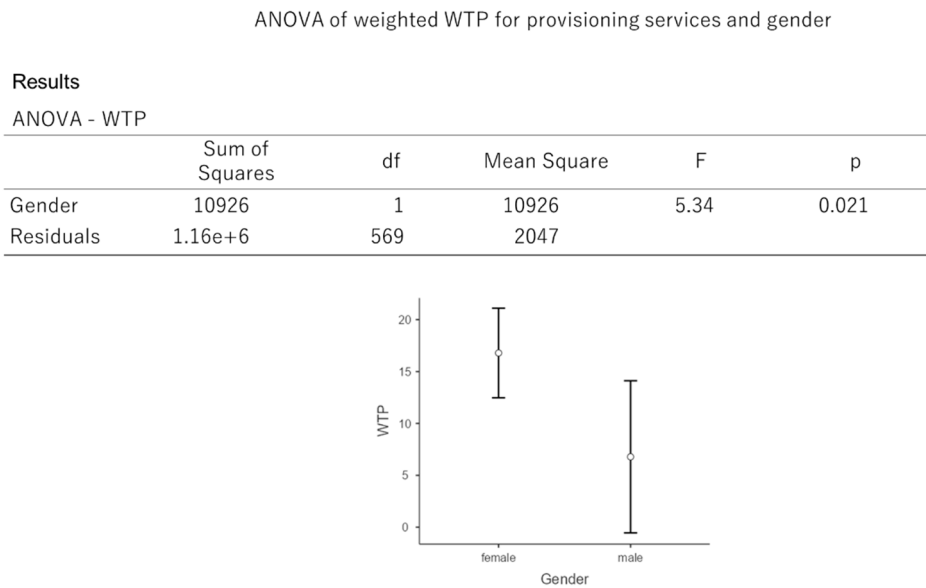

### III. Materials in landscape values mapping

Figure S15. Example of a basemap used in landscape values mapping with colored dot stickers.

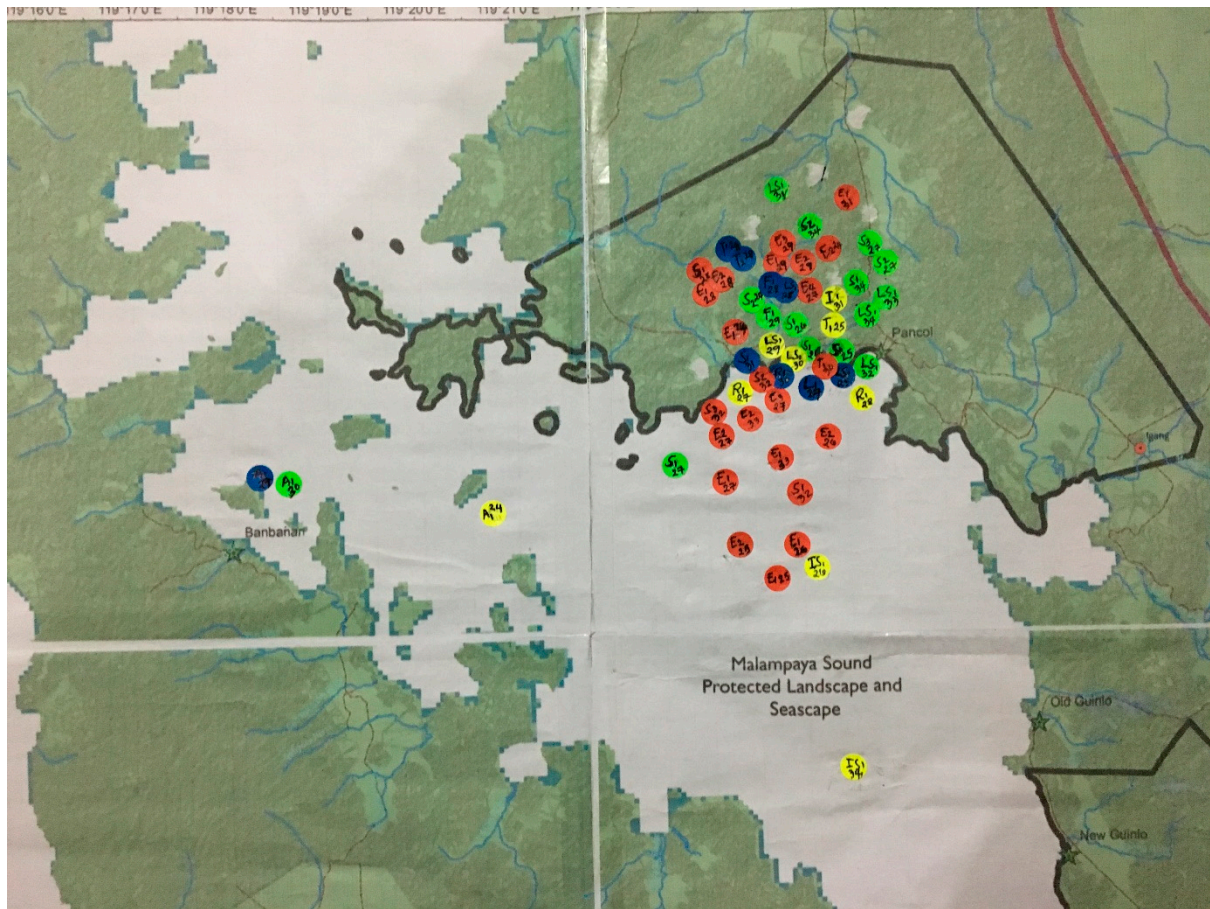

Supplement: s1 [file s1]
